# Supplementary material
Source: PubMed Central journal article supplement (PMC5437359)
Supplement: ismej20177x1.pdf [file ismej20177x1.pdf]

Supplementary Material for:

**Seasonal patterns in Arctic prasinophytes and inferred ecology of *Bathycoccus* unveiled in an Arctic winter metagenome**

Nathalie Joli <sup>1</sup>, Adam Monier<sup>2</sup>, Ramiro Logares <sup>3</sup>, Connie Lovejoy <sup>1</sup>

<sup>1</sup> Département de Biologie, Institut de Biologie Intégrative et des Systèmes (IBIS), Québec Océan, Université Laval, Québec, QC, Canada and Takuvik Joint International Laboratory, Centre National de la Recherche Scientifique (France, CNRS UMI 3376);

<sup>2</sup> Biosciences, College of Life and Environmental Sciences, University of Exeter, Exeter EX4 4QD, UK.;

<sup>3</sup> Department of Marine Biology and Oceanography, Institut de Ciències del Mar (CSIC), Barcelona, Spain.

**Table S1** Sample characteristics and environmental parameters.

**Table S2:** Proportion of each size fraction that was pooled for amplicon sequencing

**Table S3:** Arctic metagenome coverage by contigs and reads of reference genomes

**Table S4:** Original source and sizes in megabases (Mb) of the *Bathycoccus* reference Ban7 genome and metagenome assembled genomes (MAGs) referred to in the main text.

**Table S5A:** Relative abundance of the total chlorophytes reads as a percentage of microbial eukaryote reads.

**Table S5B:** Proportion of individual chlorophytes taxa (all prasinophytes) out of total eukaryotic reads.

**Table S6:** Assembly statistics of the Arctic metagenome.

**Table S7:** Meiosis related genes targeted by BLASTn against the *Bathycoccus*-like contigs from the metagenomic data.

**Table S8:** List of *Bathycoccus*-specified KEGG pathway variant genes

**Table S1:** Sample characteristics and environmental parameters. Station name (STN); latitude (Lat); longitude (Long); sample water mass origin (WM), Polar Mixed Layer (PML), halocline (HC); sample collection depth (Z) in meters (m); percent (%) of regional ice (Ice) cover; day length (DL) in hours (h) when the sun was above the horizon; temperature (T); salinity (S); chlorophyll *a* (Chl) from calibrated relative fluorescence units; nitrate + nitrite (N); and phosphate (P); data not available (NA). November and December samples were collected in 2007 and January to July samples in 2008.

| Date       | STN     | Lat °N | Long °E | WM  | Z m | Ice % | DL h | T °C | S     | Chl mg m <sup>-3</sup> | N μM | P μM |
|------------|---------|--------|---------|-----|-----|-------|------|------|-------|------------------------|------|------|
| 19 Nov     | 405     | 70.62  | 236.99  | PML | 10  | 95    | 1    | -1.7 | 30.1  | 0.08                   | 0.7  | 0.7  |
|            |         |        |         | HC  | 80  |       |      | -1.4 | 32.3  | 0.05                   | 5.4  | 1.2  |
| 07 Dec     | 5D      | 71.31  | 235.21  | PML | 10  | 95    | 0    | -1.7 | 30.6  | 0.04                   | 1.1  | 0.8  |
|            |         |        |         | HC  | 50  |       |      | -0.9 | 31.4  | 0.03                   | 5.2  | 1.1  |
| 03 Jan     | 14D     | 71.23  | 235.55  | PML | 10  | 95    | 0    | -1.7 | 31.1  | 0.02                   | 1.4  | 0.8  |
|            |         |        |         | HC  | 75  |       |      | -1.6 | 32.0  | 0.02                   | 5.0  | 0.9  |
| 18 Feb     | 22D     | 71.31  | 235.50  | PML | 12  | 96    | 8    | -1.7 | 31.7  | 0.02                   | 4.1  | 0.9  |
|            |         |        |         | HC  | 50  |       |      | -1.7 | 32.0  | 0.02                   | 7.8  | 1.2  |
| 10 Mar     | 29D     | 71.04  | 236.09  | PML | 12  | 97    | 11   | -1.7 | 31.8  | 0.05                   | 4.3  | 0.7  |
|            |         |        |         | HC  | 65  |       |      | -1.5 | 32.5  | 0.01                   | 11.0 | 0.9  |
| 17 Mar     | D29     | 70.91  | 236.52  | PML | 10  | 97    | 12   | -1.7 | 31.9  | 0.07                   | 5.1  | 1.5  |
|            |         |        |         | HC  | 50  |       |      | -1.6 | 32.2  | 0.00                   | 10.6 | 2.0  |
| 09 Apr     | D36     | 71.31  | 235.43  | PML | 10  | 90    | 16   | -1.7 | 31.9  | 0.60                   | 3.2  | 1.4  |
|            |         |        |         | HC  | 50  |       |      | -1.7 | 32.0  | 0.36                   | 5.0  | 1.5  |
| 30 Apr     | D43     | 70.77  | 236.10  | PML | 11  | 80    | 19   | -1.7 | 32.0  | 0.76                   | 3.1  | 1.4  |
|            |         |        |         | HC  | 55  |       |      | -1.7 | 32.0  | 0.78                   | 11.1 | 2.1  |
| 19 May     | 405b    | 70.66  | 237.12  | PML | 12  | 30    | 24   | -1.4 | 31.9  | 10.62                  | 1.0  | 1.2  |
|            |         |        |         | HC  | 30  |       |      | -1.3 | 32.3  | 3.12                   | 4.4  | 1.6  |
| 14 Jun     | FB01    | 69.99  | 234.45  | PML | 0   | 0     | 24   | -1.3 | 31.8  | 0.58                   | 1.5  | N/A  |
|            |         |        |         | HC  | 22  |       |      | -1.4 | 32.1  | 0.49                   | 2.5  | N/A  |
| 24 Jun     | F7b     | 69.82  | 236.35  | PML | 5   | 0     | 24   | 2.1  | 31.3  | 0.70                   | 1.3  | N/A  |
|            |         |        |         | HC  | 33  |       |      | -1.1 | 32.1  | 0.25                   | 2.3  | N/A  |
| 21 Jul     | 405-10a | 70.70  | 237.07  | PML | 4   | 0     | 24   | 8.4  | 30.5  | 0.29                   | 0.8  | 0.7  |
|            |         |        |         | HC  | 42  |       |      | -1   | 32.2  | 4.64                   | 14.6 | 1.5  |
| Metagenome |         |        |         |     |     |       |      |      |       |                        |      |      |
| 13 Dec     | 7D      | 71.62  | 233.93  | PML | 10  | 95    | 0    | -1.6 | 30.56 | NA                     | NA   | NA   |

**Table S2:** Proportion of each size fraction that was pooled for amplicon sequencing. November and December samples collected in 2007 and January to July samples collected in 2008.

|       | 19<br>Nov | 07<br>Dec | 03<br>Jan | 18<br>Feb | 10<br>Mar | 17<br>Mar | 09<br>Apr | 30<br>Apr | 19<br>May | 14<br>Jun | 24<br>Jun | 21<br>Jul |
|-------|-----------|-----------|-----------|-----------|-----------|-----------|-----------|-----------|-----------|-----------|-----------|-----------|
| Small | 41%       | 41%       | 50%       | 44%       | 50%       | 72%       | 62%       | 15%       | 10%       | 51%       | 65%       | 85%       |
| Large | 59%       | 59%       | 50%       | 56%       | 50%       | 28%       | 38%       | 85%       | 90%       | 49%       | 35%       | 15%       |

**Table S3:** Arctic metagenome coverage by contigs and reads of reference genomes: *Bathycoccus* Ban7 (RCC1105, isolated from Mediterranean, Genbank FO082278), *Micromonas* RCC299 (isolated from Equatorial Pacific, [GCF\\_000090985.2](#)), *Micromonas* CCMP1545 (isolated from English Channel, GCA\_000151265.1). Also shown is the Arctic metagenome coverage by contigs of transcriptomes available from the MMETSP (see Keeling et al. 2014): *Bathycoccus* RCC716 (isolated from Indian Ocean; CAM\_SMPL\_003310) and *Micromonas* CCMP2099 (isolated from Arctic Ocean; CAM\_SMPL\_003148 and CAM\_SMPL\_002821). Note that genome size of *Micromonas* RCC299 is 20Mb and *Bathycoccus* Ban7 is 15Mb.

|                            | Target        | % Coverage by contigs | % Coverage by reads |
|----------------------------|---------------|-----------------------|---------------------|
| <i>Bathycoccus</i> Ban7    | Genome        | 88.8                  | 95.4                |
| <i>Bathycoccus</i> RCC716  | Transcriptome | 53.0                  | -                   |
| <i>Micromonas</i> RCC299   | Genome        | 21.5                  | 21.6                |
| <i>Micromonas</i> CCMP1545 | Genome        | 2.5                   | -                   |
| <i>Micromonas</i> CCMP2099 | Transcriptome | 3.8                   | -                   |

**Table S4:** Original source and sizes in megabases (Mb) of the *Bathycoccus* reference Ban7 genome and metagenome assembled genomes (MAGs) referred to in the main text.

|                              | <b>Isolated</b>        | <b>Genome or MAG size</b> | <b>Accession number</b>               |
|------------------------------|------------------------|---------------------------|---------------------------------------|
| <i>B. prasinus</i> Ban7      | Mediterranean          | 15 Mb                     | FO082258, FO082259, FO082278-FO082260 |
| <i>B. prasinus</i> Pacific 1 | Chilean coast, Pacific | 9 Mb                      | CAFX01000001- CAFX01015049            |
| <i>B. prasinus</i> Pacific 2 | Chilean coast, Pacific | 13 Mb                     | CAFY01000001-CAFY01022174             |
| <i>B. prasinus</i> Atlantic  | Tropical Atlantic      | 7.1 Mb                    | AFUW01000001:AFUW01000185             |
| <i>B. prasinus</i> Arctic    | Amundsen Gulf, Arctic  | 12.5 Mb                   | SAMN05514161 <sup>a</sup>             |

<sup>a</sup> NCBI Biosample number which contains all the metagenomic contigs. A note saying « Bathycoccus-like » had been added to each contig taxonomically binned as Bathycoccus using Metawatt.

**Table S5A:** Relative abundance of the total chlorophytes reads as a percentage of microbial eukaryote reads (excluding Fungi and Metazoa) in the separate samples. The proportions of chlorophyte reads among Eukaryote detected over the study are given in Table S5B. Sample water mass origin (WM), Polar Mixed Layer (PML), halocline (HC) as defined in the main text.

| Template | WM  | 11 Nov | 07 Dec | 03 Jan | 18 Feb | 10 Mar | 17 Mar | 9 Apr  | 30 Apr | 19 May | 14 Jun | 24 Jun | 21 Jul |
|----------|-----|--------|--------|--------|--------|--------|--------|--------|--------|--------|--------|--------|--------|
| DNA      | PML | 4.50%  | 1.60%  | 0.50%  | 1.00%  | 0.70%  | 0.80%  | 4.80%  | 6.70%  | 2.60%  | 16.90% | 13.20% | 2.70%  |
|          | HC  | 1.20%  | 0.70%  | 0.30%  | 0.30%  | 0.20%  | 0.50%  | 3.60%  | 5.10%  | 3.50%  | 6.20%  | 2.80%  | 4.10%  |
| RNA      | PML | 3.40%  | 1.50%  | 0.80%  | 2.20%  | 5.20%  | 7.20%  | 8.50%  | 8.50%  | 1.30%  | 41.90% | 14.00% | 1.70%  |
|          | HC  | 2.20%  | 1.30%  | 2.20%  | 2.00%  | 1.00%  | 0.80%  | 11.10% | 13.40% | 0.30%  | 7.40%  | 0.40%  | 3.90%  |

**Table S5B:** Proportion of individual chlorophytes taxa (all prasinophytes) out of total eukaryotic reads from DNA or RNA templates. Water mass (WM), Polar Mixed Layer (PML), halocline (HC).

|                            | Template   | WM         | 19 Nov | 07 Dec | 03 Jan | 18 Feb | 10 Mar | 17 Mar | 09 Apr | 30 Apr | 19 May | 14 Jun | 24 Jun | 21 Jul |
|----------------------------|------------|------------|--------|--------|--------|--------|--------|--------|--------|--------|--------|--------|--------|--------|
| <b>Micromonas CCMP2099</b> | <b>DNA</b> | <b>PML</b> | 0.30%  | 0.20%  | 0.00%  | 0.20%  | 0.20%  | 0.20%  | 2.60%  | 3.50%  | 0.10%  | 14.10% | 12.80% | 0.70%  |
|                            |            | <b>HC</b>  | 0.10%  | 0.10%  | 0.00%  | 0.10%  | 0.10%  | 0.40%  | 2.40%  | 3.70%  | 0.80%  | 5.30%  | 2.50%  | 0.80%  |
|                            | <b>RNA</b> | <b>PML</b> | 1.20%  | 0.30%  | 0.40%  | 0.80%  | 2.60%  | 3.50%  | 6.00%  | 3.80%  | 0.30%  | 39.40% | 13.70% | 0.30%  |
|                            |            | <b>HC</b>  | 0.40%  | 0.60%  | 1.60%  | 0.90%  | 0.70%  | 0.60%  | 9.80%  | 11.10% | 0.30%  | 6.50%  | 0.30%  | 1.60%  |
| <b>Bathycoccus Ban7</b>    | <b>DNA</b> | <b>PML</b> | 3.20%  | 0.90%  | 0.30%  | 0.20%  | 0.30%  | 0.30%  | 0.50%  | 0.40%  | 0.00%  | 0.10%  | 0.10%  | 1.10%  |
|                            |            | <b>HC</b>  | 0.90%  | 0.30%  | 0.10%  | 0.00%  | 0.00%  | 0.00%  | 0.80%  | 0.50%  | 0.20%  | 0.20%  | 0.10%  | 0.00%  |
|                            | <b>RNA</b> | <b>PML</b> | 1.00%  | 0.50%  | 0.20%  | 0.20%  | 0.60%  | 0.40%  | 0.10%  | 0.10%  | 0.00%  | 0.10%  | 0.00%  | 0.20%  |
|                            |            | <b>HC</b>  | 0.70%  | 0.10%  | 0.10%  | 0.40%  | 0.10%  | 0.10%  | 0.20%  | 0.40%  | 0.00%  | 0.10%  | 0.00%  | 0.00%  |
| <b>Mantoniella</b>         | <b>DNA</b> | <b>PML</b> | 0.00%  | 0.00%  | 0.00%  | 0.00%  | 0.00%  | 0.00%  | 0.10%  | 0.20%  | 0.00%  | 0.00%  | 0.00%  | 0.00%  |
|                            |            | <b>HC</b>  | 0.00%  | 0.00%  | 0.00%  | 0.00%  | 0.00%  | 0.00%  | 0.20%  | 0.20%  | 0.00%  | 0.00%  | 0.00%  | 0.00%  |
|                            | <b>RNA</b> | <b>PML</b> | 0.00%  | 0.00%  | 0.00%  | 0.00%  | 0.00%  | 0.00%  | 0.00%  | 0.00%  | 0.00%  | 0.00%  | 0.00%  | 0.00%  |
|                            |            | <b>HC</b>  | 0.00%  | 0.00%  | 0.10%  | 0.00%  | 0.00%  | 0.00%  | 0.10%  | 0.10%  | 0.00%  | 0.00%  | 0.00%  | 0.00%  |
| <b>Micromonas CCMP1195</b> | <b>DNA</b> | <b>PML</b> | 0.60%  | 0.20%  | 0.10%  | 0.10%  | 0.00%  | 0.00%  | 0.10%  | 0.00%  | 0.00%  | 0.00%  | 0.00%  | 0.10%  |
|                            |            | <b>HC</b>  | 0.10%  | 0.00%  | 0.00%  | 0.00%  | 0.00%  | 0.00%  | 0.00%  | 0.00%  | 0.00%  | 0.00%  | 0.00%  | 0.00%  |
|                            | <b>RNA</b> | <b>PML</b> | 0.70%  | 0.50%  | 0.10%  | 0.10%  | 0.10%  | 0.10%  | 0.10%  | 0.10%  | 0.00%  | 0.00%  | 0.00%  | 0.10%  |
|                            |            | <b>HC</b>  | 0.50%  | 0.00%  | 0.10%  | 0.00%  | 0.00%  | 0.00%  | 0.50%  | 0.20%  | 0.00%  | 0.00%  | 0.00%  | 0.00%  |
| <b>Pterosperma</b>         | <b>DNA</b> | <b>PML</b> | 0.00%  | 0.10%  | 0.00%  | 0.00%  | 0.00%  | 0.00%  | 0.00%  | 0.00%  | 0.00%  | 0.00%  | 0.00%  | 0.40%  |
|                            |            | <b>HC</b>  | 0.00%  | 0.00%  | 0.00%  | 0.00%  | 0.00%  | 0.00%  | 0.00%  | 0.00%  | 0.00%  | 0.00%  | 0.00%  | 0.20%  |
|                            | <b>RNA</b> | <b>PML</b> | 0.00%  | 0.00%  | 0.00%  | 0.00%  | 0.00%  | 0.00%  | 0.00%  | 0.00%  | 0.00%  | 0.00%  | 0.00%  | 0.10%  |
|                            |            | <b>HC</b>  | 0.00%  | 0.00%  | 0.00%  | 0.00%  | 0.00%  | 0.00%  | 0.00%  | 0.00%  | 0.00%  | 0.00%  | 0.00%  | 0.20%  |
| <b>Pyramimonas</b>         | <b>DNA</b> | <b>PML</b> | 0.20%  | 0.30%  | 0.10%  | 0.30%  | 0.30%  | 0.20%  | 1.40%  | 2.50%  | 2.40%  | 2.50%  | 0.10%  | 0.20%  |
|                            |            | <b>HC</b>  | 0.10%  | 0.20%  | 0.20%  | 0.20%  | 0.00%  | 0.10%  | 0.20%  | 0.70%  | 2.40%  | 0.70%  | 0.20%  | 3.00%  |
|                            | <b>RNA</b> | <b>PML</b> | 0.40%  | 0.10%  | 0.10%  | 0.90%  | 1.50%  | 3.20%  | 2.30%  | 4.50%  | 0.90%  | 2.40%  | 0.20%  | 0.40%  |
|                            |            | <b>HC</b>  | 0.30%  | 0.40%  | 0.20%  | 0.50%  | 0.10%  | 0.00%  | 0.50%  | 1.50%  | 0.00%  | 0.60%  | 0.10%  | 2.00%  |

**Table S6:** Assembly statistics of the Arctic metagenome from metaQUAST (<http://bioinf.spbau.ru/quast>)

|                           |           |
|---------------------------|-----------|
| # contigs (>= 0 bp)       | 1687512   |
| # contigs (>= 1000 bp)    | 130257    |
| Total length (>= 0 bp)    | 881683496 |
| Total length (>= 1000 bp) | 333707177 |
| Largest contig            | 200608    |
| Total length              | 881683496 |
| GC (%)                    | 42.81     |
| N50                       | 615       |
| N75                       | 315       |



**Table S7:** Meiosis related genes targeted by BLASTn against the *Bathycoccus*-like contigs from the metagenomic data. References genes based on Derelle et al. 2006 and Worden et al. 2009. Function are genes or gene families; Query column lists Genbank gi numbers. Meiotic recombination protein (DMC1), DNA mismatch repair and recombination (MLH1), DNA repair/recombination protein (Mre11), DNA repair/recombination protein (RAD), DNA recombinase (RECA), DNA topoisomerase VI, subunit A (SPO11), chloroplast envelope protein translocase family (TOC) and DNA topoisomerase VI (TOP).

| Function | Query        | Bathycoccus-like contigs                          | % Identity | Evalue    | Coverage |
|----------|--------------|---------------------------------------------------|------------|-----------|----------|
| DMC1     | gi 255086168 | contig_41_26911450_length_1761_multi_4_in_0_out_0 | 69.7%      | 1.02e-50  | 42.13%   |
| DMC1     | gi 303284846 | contig_55_6029503_length_522_multi_4_in_0_out_0   | 73.4%      | 1.47e-23  | 17.11%   |
| DMC1     | gi 303284846 | contig_41_26911450_length_1761_multi_4_in_0_out_0 | 72.3%      | 1.79e-60  | 39.7%    |
| MLH1     | gi 303283871 | contig_57_2795483_length_2883_multi_4_in_0_out_0  | 67.4%      | 5.73e-26  | 20.21%   |
| Mre11    | gi 255083255 | contig_69_494867_length_2019_multi_4_in_0_out_0   | 66.1%      | 2.94e-43  | 27.11%   |
| MRE11    | gi 303288633 | contig_69_494867_length_2019_multi_4_in_0_out_0   | 65.9%      | 2.21e-38  | 27.33%   |
| MRE11    | gi 693499007 | contig_69_494867_length_2019_multi_4_in_0_out_0   | 68.9%      | 1.01e-35  | 19.97%   |
| RAD50    | gi 255071308 | contig_51_8008664_length_2279_multi_4_in_0_out_0  | 75.4%      | 2.61e-90  | 12.36%   |
| RAD50    | gi 255071308 | contig_41_2430054_length_3324_multi_4_in_0_out_0  | 69.5%      | 7.99e-59  | 14.83%   |
| RAD50    | gi 693501461 | contig_41_2430054_length_3324_multi_4_in_0_out_0  | 73.6%      | 1.21e-94  | 13.8%    |
| RAD50    | gi 693501461 | contig_51_8008664_length_2279_multi_4_in_0_out_0  | 69.5%      | 7.14e-66  | 13.95%   |
| RAD51    | gi 255075466 | contig_41_26911450_length_1761_multi_4_in_0_out_0 | 67.2%      | 1.45e-10  | 19.71%   |
| RAD51    | gi 255075466 | contig_47_6166815_length_1105_multi_4_in_0_out_0  | 68.2%      | 8.58e-39  | 41.93%   |
| RAD51    | gi 255081794 | contig_41_26911450_length_1761_multi_4_in_0_out_0 | 67.2%      | 1.75e-10  | 16.43%   |
| RAD51    | gi 255081794 | contig_47_6166815_length_1105_multi_4_in_0_out_0  | 68.2%      | 1.03e-38  | 34.94%   |
| RAD51    | gi 303279525 | contig_41_26911450_length_1761_multi_4_in_0_out_0 | 66.1%      | 2.83e-09  | 14.62%   |
| RAD51    | gi 303279525 | contig_47_6166815_length_1105_multi_4_in_0_out_0  | 71.4%      | 7.10e-55  | 26.07%   |
| RAD51A   | gi 303279167 | contig_41_26911450_length_1761_multi_4_in_0_out_0 | 66.1%      | 2.47e-09  | 16.69%   |
| RAD51A   | gi 303279167 | contig_47_6166815_length_1105_multi_4_in_0_out_0  | 71.4%      | 6.20e-55  | 29.76%   |
| RAD51C   | gi 303272032 | contig_49_9069687_length_1612_multi_4_in_0_out_0  | 64.5%      | 5.58e-16  | 38.03%   |
| RAD51C   | gi 303273073 | contig_41_2430054_length_3324_multi_4_in_0_out_0  | 72.8%      | 1.06e-83  | 11.13%   |
| RAD51D   | gi 255079113 | contig_47_7431291_length_1342_multi_4_in_0_out_0  | 68.6%      | 2.22e-07  | 17.97%   |
| RAD54    | gi 255082184 | contig_55_5843141_length_2538_multi_5_in_0_out_0  | 73.5%      | 3.46e-56  | 10.91%   |
| RAD54    | gi 255082184 | contig_37_4621688_length_1168_multi_4_in_0_out_0  | 65.2%      | 5.87e-28  | 16.47%   |
| RAD54    | gi 303279421 | contig_37_4621688_length_1168_multi_4_in_0_out_0  | 68.1%      | 9.97e-57  | 19.85%   |
| RAD54    | gi 303279421 | contig_55_5843141_length_2538_multi_5_in_0_out_0  | 68.5%      | 1.48e-73  | 23.17%   |
| RECA     | gi 255080473 | contig_29_66625928_length_996_multi_4_in_0_out_0  | 72.7%      | 2.68e-130 | 46.26%   |
| RECA     | gi 303271542 | contig_29_66625928_length_996_multi_4_in_0_out_0  | 75.0%      | 9.12e-173 | 66.59%   |
| SPO11    | gi 693499744 | contig_73_1282211_length_1398_multi_4_in_0_out_0  | 76.3%      | 0         | 73.05%   |
| TOC      | gi 303289255 | contig_59_5833480_length_3632_multi_4_in_0_out_0  | 70.7%      | 9.09e-51  | 13.06%   |
| TOC      | gi 303289255 | contig_71_1892218_length_2815_multi_5_in_0_out_0  | 63.3%      | 1.11e-11  | 17.59%   |
| TOC      | gi 693498025 | contig_59_4385194_length_1832_multi_4_in_0_out_0  | 72.4%      | 2.65e-82  | 18.83%   |
| TOP6A    | gi 255070110 | contig_73_1282211_length_1398_multi_4_in_0_out_0  | 71.0%      | 1.45e-112 | 71.68%   |
| TOP6B    | gi 255073850 | contig_33_18016919_length_864_multi_4_in_0_out_0  | 68.7%      | 1.51e-64  | 31.34%   |
| TOP6B    | gi 303276025 | contig_33_18016919_length_864_multi_4_in_0_out_0  | 71.1%      | 2.73e-93  | 29.25%   |

**Table S8:** List of *Bathycoccus*-specified KEGG pathway variant genes (Gene affected). The type of variant refers to specific variation that would have a high effect on the final putative protein. The search was carried out was against *Bathycoccus prasinus* pathways implemented in KEGG.

| Bathycoccus-specific KEGG pathway                           | Gene affected                                                                            | Type of variant           |
|-------------------------------------------------------------|------------------------------------------------------------------------------------------|---------------------------|
| bpg01110<br>Biosynthesis of secondary metabolites           | K00611 OTC; ornithine carbamoyltransferase [EC:2.1.3.3]                                  | frameshift                |
|                                                             | K00640 cysE; serine O-acetyltransferase [EC:2.3.1.30]                                    | start loss, stop gain     |
|                                                             | K01899 LSC1; succinyl-CoA synthetase alpha subunit [EC:6.2.1.4 6.2.1.5]                  | stop gain                 |
|                                                             | K01918 panC; pantoate--beta-alanine ligase [EC:6.3.2.1]                                  | stop gain                 |
|                                                             | K11778 DHDDS; ditrans,polycis-polyprenyl diphosphate synthase [EC:2.5.1.87]              | start loss, stop gain     |
|                                                             | K13789 GGPS; geranylgeranyl diphosphate synthase, type II [EC:2.5.1.1 2.5.1.10 2.5.1.29] | stop gain                 |
| K15634 gpmB; probable phosphoglycerate mutase [EC:5.4.2.12] | stop gain                                                                                |                           |
| bpg00480<br>Glutathione metabolism                          | K00799 GST; glutathione S-transferase [EC:2.5.1.18]                                      | stop gain                 |
| bpg03010<br>Ribosome                                        | K02875 RP-L14e; large subunit ribosomal protein L14e                                     | stop gain                 |
|                                                             | K02925 RP-L3e; large subunit ribosomal protein L3e                                       | frameshift                |
|                                                             | K02927 RP-L40e; large subunit ribosomal protein L40e                                     | start loss, stop gain     |
|                                                             | K02929 RP-L44e; large subunit ribosomal protein L44e                                     | stop gain                 |
|                                                             | K02964 RP-S18e; small subunit ribosomal protein S18e                                     | stop gain                 |
|                                                             | K02997 RP-S9e; small subunit ribosomal protein S9e                                       | stop gain                 |
| bpg01200 Carbon metabolism                                  | K00640 cysE; serine O-acetyltransferase [EC:2.3.1.30]                                    | start loss, stop gain     |
|                                                             | K01899 LSC1; succinyl-CoA synthetase alpha subunit [EC:6.2.1.4 6.2.1.5]                  | stop gain                 |
|                                                             | K15634 gpmB; probable phosphoglycerate mutase [EC:5.4.2.12]                              | stop gain                 |
| bpg01230<br>Biosynthesis of amino acids                     | K00611 OTC; ornithine carbamoyltransferase [EC:2.1.3.3]                                  | frameshift                |
|                                                             | K00640 cysE; serine O-acetyltransferase [EC:2.3.1.30]                                    | start loss, stop gain     |
|                                                             | K15634 gpmB; probable phosphoglycerate mutase [EC:5.4.2.12]                              | stop gain                 |
| bpg04141 Protein processing in endoplasmic reticulum        | K10597 UBE4B; ubiquitin conjugation factor E4 B [EC:2.3.2.27]                            | stop gain                 |
|                                                             | K13993 HSP20; HSP20 family protein                                                       | stop gain                 |
|                                                             | K14004 SEC13; protein transport protein SEC13                                            | start loss, stop gain     |
| bpg03015 mRNA surveillance pathway                          | K14404 CPSF4; cleavage and polyadenylation specificity factor subunit 4                  | frameshift, splice region |
|                                                             | K14408 CSTF3; cleavage stimulation factor subunit 3                                      | splice region, stop loss  |
|                                                             | K15542 PFS2; polyadenylation factor subunit 2                                            | stop gain                 |
| bpg03018 RNA degradation                                    | K12580 CNOT3; CCR4-NOT transcription complex subunit 3                                   | start loss, stop gain     |
|                                                             | K12598 MTR4; ATP-dependent RNA helicase DOB1 [EC:3.6.4.13]                               | stop gain                 |
|                                                             | K12623 LSM4; U6 snRNA-associated Sm-like protein LSM4                                    | stop gain                 |
| bpg04120 Ubiquitin mediated proteolysis                     | K10586 BIRC6; baculoviral IAP repeat-containing protein 6 (apollon) [EC:2.3.2.23]        | splice region, stop loss  |
|                                                             | K10597 UBE4B; ubiquitin conjugation factor E4 B [EC:2.3.2.27]                            | stop gain                 |
|                                                             | K10598 PPIL2; peptidyl-prolyl cis-trans isomerase-like 2 [EC:5.2.1.8]                    | stop gain                 |
| bpg03013 RNA transport                                      | K03243 EIF5B; translation initiation factor 5B                                           | stop gain                 |
|                                                             | K13137 STRAP; serine-threonine kinase receptor-associated protein                        | stop gain                 |
|                                                             | K14004 SEC13; protein transport protein SEC13                                            | start loss, stop gain     |
| bpg00190<br>Oxidative phosphorylation                       | K02126 ATPeF0A; F-type H+-transporting ATPase subunit a                                  | stop gain                 |
|                                                             | K02151 ATPeV1F; V-type H+-transporting ATPase subunit F                                  | stop gain                 |
|                                                             | K02267 COX6B; cytochrome c oxidase subunit 6b                                            | stop gain                 |
| bpg03040<br>Spliceosome                                     | K12623 LSM4; U6 snRNA-associated Sm-like protein LSM4                                    | stop gain                 |
|                                                             | K12822 RBM25; RNA-binding protein 25                                                     | frameshift                |
|                                                             | K12850 PRPF38B; pre-mRNA-splicing factor 38B                                             | stop gain                 |
| bpg00564<br>Glycerophospholipid metabolism                  | K14676 NTE; lysophospholipid hydrolase [EC:3.1.1.5]                                      | stop gain                 |
| bpg03030 DNA replication                                    | K01972 E6.5.1.2; DNA ligase (NAD+) [EC:6.5.1.2]                                          | stop gain                 |
|                                                             | K02212 MCM4; DNA replication licensing factor MCM4 [EC:3.6.4.12]                         | stop gain                 |
| bpg03420<br>Nucleotide excision repair                      | K01972 E6.5.1.2; DNA ligase (NAD+) [EC:6.5.1.2]                                          | stop gain                 |
|                                                             | K10842 MNAT1; CDK-activating kinase assembly factor MAT1                                 | stop gain                 |
| bpg00900<br>Terpenoid                                       | K11778 DHDDS; ditrans,polycis-polyprenyl diphosphate synthase [EC:2.5.1.87]              | start loss, stop gain     |
|                                                             | K13789 GGPS; geranylgeranyl diphosphate synthase, type II [EC:2.5.1.1 2.5.1.10 2.5.1.29] | stop gain                 |

|                                                          |                                                                                                     |                          |
|----------------------------------------------------------|-----------------------------------------------------------------------------------------------------|--------------------------|
| <b>backbone biosynthesis</b>                             |                                                                                                     |                          |
| <b>bpg00270 Cysteine and methionine metabolism</b>       | K00640 cysE; serine O-acetyltransferase [EC:2.3.1.30]                                               | start loss, stop gain    |
| <b>bpg04144 Endocytosis</b>                              | K07937 ARF1; ADP-ribosylation factor 1                                                              | stop gain                |
|                                                          | K11824 AP2A; AP-2 complex subunit alpha                                                             | stop gain                |
| <b>bpg00920 Sulfur metabolism</b>                        | K00640 cysE; serine O-acetyltransferase [EC:2.3.1.30]                                               | start loss, stop gain    |
| <b>bpg03440 Homologous recombination</b>                 | K08991 MUS81; crossover junction endonuclease MUS81 [EC:3.1.22.-]                                   | stop gain                |
|                                                          | K10875 RAD54L; DNA repair and recombination protein RAD54 and RAD54-like protein [EC:3.6.4.-]       | stop gain                |
| <b>bpg00260 Glycine, serine and threonine metabolism</b> | K15634 gpmB; probable phosphoglycerate mutase [EC:5.4.2.12]                                         | stop gain                |
| <b>bpg00010 Glycolysis / Gluconeogenesis</b>             | K15634 gpmB; probable phosphoglycerate mutase [EC:5.4.2.12]                                         | stop gain                |
| <b>bpg03008 Ribosome biogenesis in eukaryotes</b>        | K14572 MDN1; midasin                                                                                | stop gain                |
| <b>bpg00590 Arachidonic acid metabolism</b>              | K15730 PTGES3; cytosolic prostaglandin-E synthase [EC:5.3.99.3]                                     | stop gain                |
| <b>bpg04145 Phagosome</b>                                | K02151 ATPeV1F; V-type H <sup>+</sup> -transporting ATPase subunit F                                | stop gain                |
| <b>bpg03430 Mismatch repair</b>                          | K01972 E6.5.1.2; DNA ligase (NAD <sup>+</sup> ) [EC:6.5.1.2]                                        | stop gain                |
| <b>bpg00970 Aminoacyl-tRNA biosynthesis</b>              | K03341 SEPSECS; O-phospho-L-seryl-tRNA <sup>Sec</sup> :L-selenocysteinyl-tRNA synthase [EC:2.9.1.2] | stop gain                |
| <b>bpg00640 Propanoate metabolism</b>                    | K01899 LSC1; succinyl-CoA synthetase alpha subunit [EC:6.2.1.4 6.2.1.5]                             | stop gain                |
| <b>bpg00450 Selenocompound metabolism</b>                | K03341 SEPSECS; O-phospho-L-seryl-tRNA <sup>Sec</sup> :L-selenocysteinyl-tRNA synthase [EC:2.9.1.2] | stop gain                |
| <b>bpg04140 Regulation of autophagy</b>                  | K08333 PIK3R4; phosphoinositide-3-kinase, regulatory subunit 4 [EC:2.7.11.1]                        | stop gain                |
| <b>bpg00410 beta-Alanine metabolism</b>                  | K01918 panC; pantoate--beta-alanine ligase [EC:6.3.2.1]                                             | stop gain                |
| <b>bpg00770 Pantothenate and CoA biosynthesis</b>        | K01918 panC; pantoate--beta-alanine ligase [EC:6.3.2.1]                                             | splice region, stop gain |
| <b>bpg04070 Phosphatidylinositol signaling system</b>    | K13024 PPIP5K; inositol-hexakisphosphate/diphosphoinositol-pentakisphosphate 1-kinase [EC:2.7.4.24] | stop gain                |
| <b>bpg03022 Basal transcription factors</b>              | K10842 MNAT1; CDK-activating kinase assembly factor MAT1                                            | stop gain                |
| <b>bpg00195 Photosynthesis</b>                           | K03541 psbR; photosystem II 10kDa protein                                                           | frameshift               |
| <b>bpg00561 Glycerolipid metabolism</b>                  | K00679 E2.3.1.158; phospholipid:diacylglycerol acyltransferase [EC:2.3.1.158]                       | start loss, stop gain    |
| <b>bpg03410 Base excision repair</b>                     | K01972 E6.5.1.2; DNA ligase (NAD <sup>+</sup> ) [EC:6.5.1.2]                                        | stop gain                |
| <b>bpg00220 Arginine biosynthesis</b>                    | K00611 OTC; ornithine carbamoyltransferase [EC:2.1.3.3]                                             | frameshift               |
| <b>bpg00020 Citrate cycle (TCA cycle)</b>                | K01899 LSC1; succinyl-CoA synthetase alpha subunit [EC:6.2.1.4 6.2.1.5]                             | stop gain                |
