# Supplementary material
Source: PubMed Central journal article supplement (PMC5437359)
Supplement: ismej20177x2.pdf [file ismej20177x2.pdf]

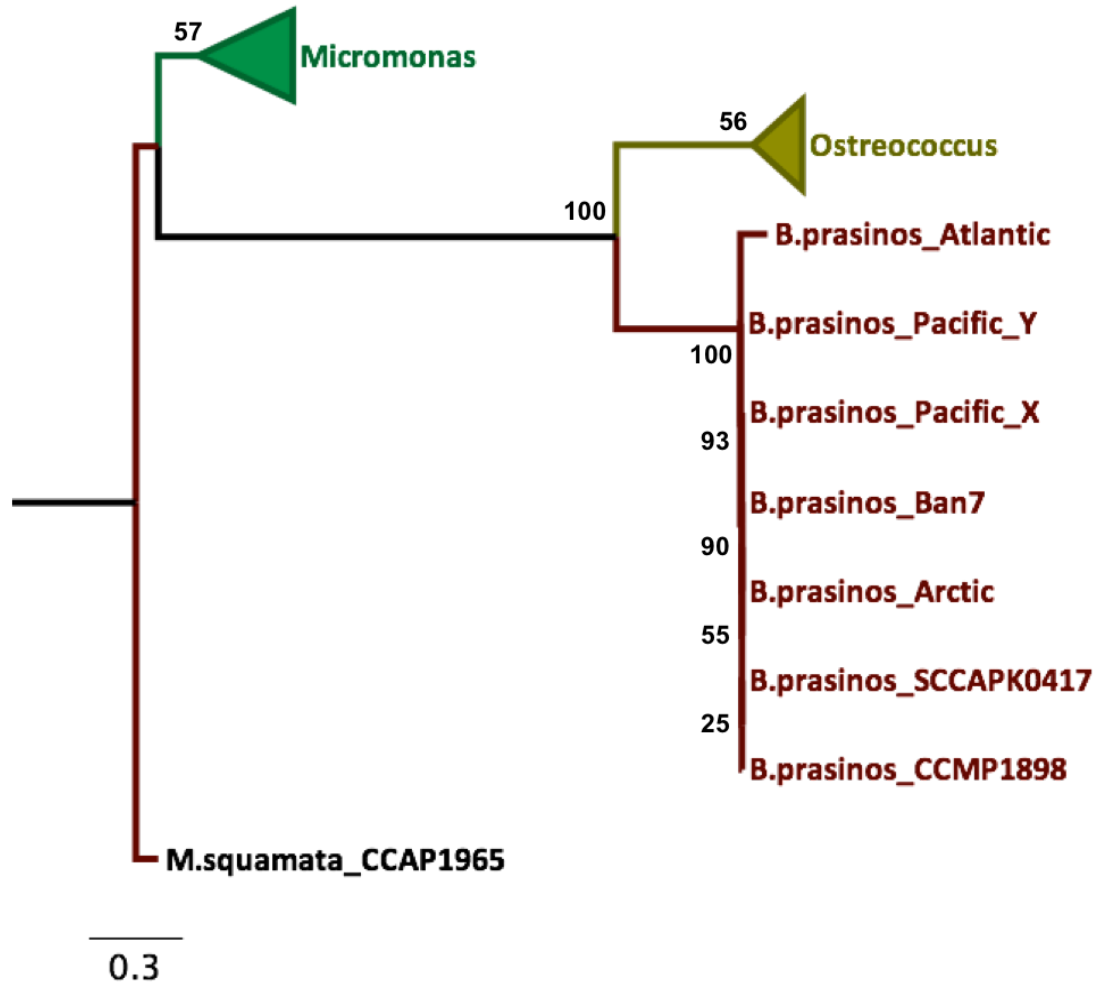

**Figure S2:** *Bathycoccus* phylogeny based on ITS2 rRNA genes. ML reconstruction using model GTR+G based on a multiple sequence alignment of 221 nucleotide positions. (Bootstrap replicate=100). Sequences from *B. prasinus*\_Atlantic corresponds to a sorted population collected in the SE Atlantic open ocean (AFUW00000000.1); *B. prasinus*\_Pacific\_X et Y from a sorted population collected in Pacific coastal Chilean upwelling zone (CAFY01000001.1, CAFY01000001.1); *B. prasinus*\_Ban7 from a cultured strain originally isolated from near Banyules, Mediterranean; *B. prasinus*\_Arctic from this study; *B. prasinus*\_SCCAPK0417 and *B. prasinus*\_CCMP1898 was isolated from Italian Mediterranean coast (FN562453.1, FN562453.1). All 18S rRNA genes had ca. 100% similarity.
